# Supplementary material for: Are ELISA and PCR Discrepancies in the Identification of Chlamydia pneumoniae Caused by the Presence of “Chlamydia-Related Bacteria”?
Source: MDPI journal article supplement (doi:10.3390/microorganisms11010187), 2023-01-11
Supplement: s1 [file s1]

|                              | Panout<br>RYGGGAGAA                                                              |
|------------------------------|----------------------------------------------------------------------------------|
| Protoch.naegleriophila       | AACCTCGGAACAGCATTTGAAACTACATCTCTCGAGGGTAGGCGGAGAAA                               |
| Ca.Protoch.amoebophila       | AACCTCGGAACAGCATTTGAAACTACATCTCTAGAGGGTAGGCGGAGAAA                               |
| Parach.acanthamoebae         | AACCTCGGAACAGCATTTGACACTATATTTCTTGAGGGTAGGCGGAGAAA                               |
| Ca.Metachlamydia             | AACCCCGGAACAGCATTTGAAACTCCATTTCTAGAGGGTAGGCGGAGAAA                               |
| Ca.Mesoch.elodeae            | AACCTCGGAACAGCATTTGAAACTCCCTTTCTAGAGGGTAGGCGGAGAAA                               |
| Ca.Rubidus.massiliensis      | AACCTCGGAGCTGCATAGGAACTTCTGTCTAGAGGGTAGGCGGAGAAA                                 |
| Neoch.hartmannellae          | AACCCCGGAACAGCATTTGAAACTCCCTTTCTTGAGGGTAGACGGAGAAA                               |
| Can.Fritschea_bemisiae       | AACCTCGAAGCTGCATTTGAAACTGCTTGTCTAGAGGGTAGACGGAGAAA                               |
| Ca.Fritschea_eriococci       | AACCTCGAAGCTGCATTTGAAACTGCTTGTCTAGAGGTAGACGGAGAAA                                |
| Ca.Syngnamydia               | AACCTCGAAGCTGCATTTGAAACTATTTGTCTTGAGGGTAGACGGAGAAA                               |
| Ca.Neptunoch.vexilliferae    | AACCTCGAAGCTGCATTTGAAACTACTAATCTTGAGGGTAGACGGAGAAA                               |
| Ca.Syngnamydia_venezia       | AACCTCGAAGCTGCATTTAAACTACTGATCTTGAGGGTAGACGAAGAAA                                |
| Simkania_negevensis          | AACCTCGGAGCTGCATTTGAAACTACTTATCTTGAGGGTAGACGGAGAAA                               |
| Rhabdoch.crassificans        | AACCTCGGAGCCGCATTTGAAACTGCAATCTTGAGGAATGGCGGAGGAA                                |
| Ca.Rhabdoch.porcellionis     | AACCTTTGGAGCCGCATTTGAAACTGCAATCTTGAGGGTAGCGGAGGAA                                |
| Ca.Renich.lutjani            | AACCCCGGAGCTGCATTTAAACTATATTTATAGAGGGTAGCGGAGGAAA                                |
| Waddlia_sp.G817              | AACCCCGGAACCTGCGTTTGAAGTATATTTCTTGAGGCAAGCGGAGAAA                                |
| Waddlia_chondrophila         | AACCCCGGAACCTGCGTTTGAAGTATATTTCTAGAGGCAAGCGGAGAAA                                |
| Estrella                     | AACCTCAGGGCGGCACCTGAAACTATTTGTCTAGAGGGTAGGCGGAGAAA                               |
| Criblamydia_sequanensis      | AACCTCGGAACGGCACTCGAAACTGTGTTTCTAGAGGTAGAGGAGAAA                                 |
| Ch.sanzinia                  | AACCCCAAGTCAGCACTTAATACTGCTTTTCTAGAGGTAGATGGAGAAA                                |
| Ch.ibidis                    | AACCTCCAAACAGGCATCTAATACTATCTTTCTAGAGGTAGATGGAGAAA                               |
| Ch.pneumoniaeAR39            | AACCCCAAGTCAGCATTTAAACTATCTTTCTAGAGGTAGATGGGAGAAA                                |
| Ch.pecorum                   | AACCTCAAGTCGGCATCTAATACTATCTTTCTAGAGGTGGATGGAGAAA                                |
| Ch.felis_strain              | AACCCCAAAATCGGCATCTAATACTATCTTTCTAGAGGTAGATGGAGAAA                               |
| Ch.caviae                    | AACCCCAAGCCAGCATCTAATACTATCTTTCTAGAGGGTAGATGGAGAAA                               |
| Ch.psittaci                  | AACCCCAAGCCAGCATCTAATACTATCTTTCTTGAGGGTAGATGGAGAAA                               |
| Ch.gallinacea_08-1274/3      | AACCTCAAGCCGGCATCTAATACTATCTTTCTAGAGGGTAGATGGAGAAA                               |
| Ch.avium_strain              | AACCTTAAGTCAGCATCTAATACTATCTTTCTAGAGGGTAGATGGAGAAA                               |
| Ch.suis                      | AACCCGAATCGGCATCTGATACTATTTTTCTAGAGGGTAGATGGAGAAA                                |
| Ch.muridarum                 | AACCCCGAATCGGCATCTAAACTATTTTTCTAGAGGGTAGATGGAGAAA                                |
| Ch.trachomatis               | AACCCCGAGTCGGCATCTAATACTATTTTTCTAGAGGTAGATGGAGAAA                                |
| Ca.Amphibiich.               | AACCTCAAGTCAGCATCTAATACTGCCTATCTAGAGGACAGATGGAGAAA                               |
| Ca.Amphibiich.ranarum_strain | AACCTCAAGTCAGCATCTAATACTATCTATCTAGAGGACAGACGGAGAAA                               |
| Ca.Clavochl.salmonicola      | AACCCCGAACAGGCATCTAAACTGTATTTCTAGAGGTGGGAGGAGAAA                                 |
| Ca.Similich.latridicola      | ATCTCCGGA-CTGCATACAAAACCTGCTCAGCTAGAGTATAAGAGGGGAAA                              |
| Ch.bacterium_clone           | ATCTTCGGA-CTGCATACAAAACCTGCTTGACTAGAGTGAAGAGGGGAAA                               |
| Ca.Similich.labri            | ATCTCCGGA-CTGCATACAAAACCTGTTGAGCTAGAGCATAAGAGGGGAAA                              |
| Ch.bacterium_CF280911-8      | ATCTCCGGA-TCGCATACAAAACCTGCTTGACTAGAGTGAATAGGGGAAA                               |
| Ca.Piscichl._salmonis        | ACCCCCAGG-CTGCTTCCAAAACCTGCTAGACTAGAGTTCAAGAGGGGAAA                              |
|                              | * *            **            *    ***            *    ***            *    *    * |
|                              | RYGGGAGAA                                                                        |

|                           | Panout<br>RNGGAATTCCA                              |
|---------------------------|----------------------------------------------------|
| Protoch.naegleriophila    | ACGGAATTCACAAAGTAGC-GGTGAAA-TGCGTAGATATGTGGAAGAACA |
| Ca.Protoch.amoebophila    | ACGGAATTCACAAAGTAGC-GGTGAAA-TGCGTAGATATGTGGAAGAACA |
| Parach.acanthamoebae      | ACGGAATTCACATGTAGC-GGTGAAA-TGCGTAGATATGTGGAAGAACA  |
| Ca.Metachlamydia          | ACGGAATTCACAAAGTAGC-GGTGAAA-TGCGTAGATATGTGGAAGAACA |
| Ca.Mesoch.elodeae         | ACGGAATTCACAAAGTAGC-GGTGAAA-TGCGTAGATATGTGGAAGAACA |
| Ca.Rubidus.massiliensis   | ATGGAATTCACAAAGTAGC-GGTGAAA-TGCGTAGATATGTGGAAGAACA |
| Neoch.hartmannellae       | ATGGAATTCACAAAGTAGC-GGTGAAA-TGCGTAGATATGTGGAAGAACA |
| Can.Fritschea_bemisiae    | ACGGAATTCCAAGGTAGC-GGTGAAA-TGCGTAGATATTTGGAAGAACA  |
| Ca.Fritschea_eriococci    | ACGGAATTCCAAGGTAGC-GGTGAAA-TGCGTAGATATTTGGAAGAACA  |
| Ca.Syngnamydia            | ACGGAATTCCAAGGTAGC-GGTGAAA-TGCGTAGATATTTGGAAGAACA  |
| Ca.Neptunoch.vexilliferae | ACGGAATTCCAAGGTAGC-GGTGAAA-TGCGTAGATATTTGGAAGAACA  |
| Ca.Syngnamydia_venezia    | ATGGAATTCCAAGGTAGC-GGTGAAA-TGCGTAGATATTTGGAAGAACA  |
| Simkania_negevensis       | ACGGAATTCACGTGTAGC-GGTGAAA-TGCGTAGATATGTGGAAGAACA  |
| Rhabdoch.crassificans     | ACGGAATTCACGTGTAGC-GGTGAAA-TGCTTAGATATGTGGAAGAACA  |
| Ca.Rhabdoch.porcellionis  | ACGGAATTCACGTGTAGC-GGTGAAA-TGCGTAGATATGTGGAAGAACA  |
| Ca.Renich.lutjani         | ATGGAATTCACGTGTAGC-GGTGAAA-TGCGTAGAAATGTGGAAGAACA  |
| Waddlia_sp.G817           | ACGGAATTCACATGTAGC-GGTGAAA-TGCGTAGATATGTGGAAGAACA  |
| Waddlia_chondrophila      | ACGGAATTCCTCATGTTGCCGGTGAAATGCGTAGATATTTGGAAGAACA  |
| Estrella                  | ACGGAATTCACAAAGTAGC-GGTGAAA-TGCGTAGATATGTGGAAGAACA |
| Criblamydia_sequanensis   | ATGGAATTCACAAAGTAGC-GGTGAAA-TGCGTAGATATGTGGAAGAACA |
| Ch.sanzinia               | AGGGAATTCACATGTAGC-GGTGAAA-TGCGTAGATATGTGGAAGAACA  |
| Ch.ibidis                 | AGGGAATTCACGTGTAGC-GGTGAAA-TGCGTAGATATGTGGAAGAACA  |
| Ch.pneumoniaeAR39         | AGGGAATTCACGTGTAGC-GGTGAAA-TGCGTAGATATGTGGAAGAACA  |
| Ch.pecorum                | AGGGAATTCACGTGTAGC-GGTGAAA-TGCGTAGATATGTGGAAGAACA  |
| Ch.felis_strain           | AGGGAATTCACGTGTAGC-GGTGAAA-TGCGTAGATATGTGGAAGAACA  |
| Ch.caviae                 | AGGGAATTCACGTGTAGC-GGTGAAA-TGCGTAGATATGTGGAAGAACA  |
| Ch.psittaci               | AGGGAATTCACGTGTAGC-GGTGAAA-TGCGTAGATATGTGGAAGAACA  |
| Ch.gallinacea_08-1274/3   | AGGGAATTCACGTGTAGC-GGTGAAA-TGCGTAGATATGTGGAAGAACA  |
| Ch.avium_strain           | AGGGAATTCACGTGTAGC-GGTGAAA-TGCGTAGATATGTGGAAGAACA  |
| Ch.suis                   | AGGGAATTCACGTGTAGC-GGTGAAA-TGCGTAGATATGTGGAAGAACA  |

AGGGAATTTACAGTGTAGC -GGTGAAA -TGCGTAGATATGTGGAAGAACA  
AGGGAATTTACAGTGTAGC -GGTGAAA -TGCGTAGATATGTGGAAGAACA  
AGGGAATTCACAGTGTAGC -GGTGAAA -TGCGTAGATATGTGGAAGAACA  
AGGGAATTCACATGTAGC -GGTGAAA -TGCGTAGATATGTGGAAGAACA  
AGGGAATTCACAGTGTAGC -GGTGAAA -TGCGTAGATATGTGGAAGAACA  
GCGGAATTCACAAGTAGC -GGTGAAA -TGCGTAGATATGTGGAGGAACA  
GCGGAATTCACAAGTAGC -GGTGAAA -TGCGTAGATATGTGGAGGAACA  
GCGGAATTCACAAGTAGC -GGTGAAA -TGCGTAGATATGTGGAGGAACA  
GCGGAATTCACAAGTAGC -GGTGAAA -TGCGTAGATATGTGGAGGAACA  
ATGGAATTCACAAGTAGC -GGTGAAA -TGCGTAGATATGTGGAGGAACA

\*\*\*\*\* \*

RN GGAATTCCA

## Panin

GTGGCGAAGGCGCTTTC

[illegible]

GTGGCGAAGGCGCTTTTC

[illegible]

Protocn.naegleriophila  
 Ca.Protocn.amoebophila  
 Parach.acanthamoebae  
 Ca.Metach.  
 Ca.Mesoch.elodeae  
 Ca.Rubidus.massiliensis  
 Neoch.hartmannellae  
 Can.Fritschea.bemisiae  
 Ca.Fritschea.ericoccci  
 Ca.Syngnamydia  
 Ca.Neptunoch.vexilliferae  
 Ca.Syngnamydia.venezia  
 Simkania.negevensis  
 Rhabdoch.crassificans  
 Ca.Rhabdoch.porcellionis  
 Ca.Renich.lutjani  
 Waddlia.sp.G817  
 Waddlia.chondrophila  
 Estrella  
 Criblamydia.sequanensis  
 Ch.sanzinia  
 Ch.ibidis  
 Ch.pneumoniaeAR39  
 Ch.pecorum  
 Ch.felis\_strain  
 Ch.caviae  
 Ch.psittaci  
 Ch.gallinacea\_08-1274/3  
 Ch.avium\_strain  
 Ch.suis  
 Ch.muridarum  
 Ch.trachomatis  
 Ca.Amphibiich.  
 Ca.Amphibiich.ranarum\_strain  
 Ca.Clavochl.salmonicola  
 Ca.Similich.latridicola  
 Ch.bacterium\_clone  
 Ca.Similich.labri  
 Ch.bacterium\_CF280911-8  
 Ca.Piscichl.salmonis

GTATAGGGG-ATCAAAACAGGATTAGATACCTGGTAGTCCTTAACGTAAAC  
GC-AAGGGGAGCAAAACAGGATTAGATACCTGGTAGTCCTTGCCGTA AAC  
GCATGGGG-AGCAAAACAGGATTAGATACCTGGTAGTCCTTGCCGTA AAC  
GCATGGGG-AGCAAAACAGGATTAGATACCTGGTAGTCCTTGCCGTA AAC  
GCATGGGG-AGCAAAACAGGATTAGATACCTGGTAGTCCTTGCCGTA AAC  
GCATGGGG-AGCAAAACAGGATTAGATACCTGGTAGTCCTTGCCGTA AAC  
GCAAGGGG-AGCAAAACAGGATTAGATACCTGGTAGTCCTTGCCGTA AAC  
\*   \*   \*   \*   \*   \*   \*   \*   \*   \*   \*   \*   \*   \*   \*

[illegible]

GCGTTAAGTATACCGCCTGGGGAGTAGCTCGCAAGGCTGAAACTCAAAA  
GCGTTAAGTATACCGCTGGGGAGTAGCTCGCAAGGCTGAAACTCAAAA  
GCGTTAAGTATACCGCTGGGGAGTAGCTCGCAAGGCTGAAACTCAAAA  
GCGATAAGTATACCGCCTGGGGAGTAGCTCGCAAGGCTGAAACTCAAAA  
GCGATAAGTATACCGCTGGGGAGTAGCTCGCAAGGCTGAAACTCAAAA  
GCGATAAGTATACCGCTGGGGAGTAGCTCGCAAGGCTGAAACTCAAAA  
GCGATAAGTATACCGCCTGAGGAGTAGCTCGCAAGGCTGAAACTCAAAA  
GCGTTAAGTATGCCACTGAGGAGTAGCCGCCGAAGGCTGAAACTCAAAA  
GCGTTAAGTATGCCACTGAGGAGTAGCCGCCGAAGGCTGAAACTCAAAA



```

122E AGCAAGGGGAGCAAACAGGATTAGATACCCTGGTAGTCCTTGCCCTAAACATGATA
85E AGCAAGGGGAGCAAACAGGATTAGATACCCTGGTAGTCCTTGCCCTAAACATGATA
20E AGCAAGGGGAGCAAACAGGATTAGATACCCTGGTAGTCCTTGCCCTAAACGATGCATA
1E AGCAAGGGGAGCAAACAGGATTAGATACCCTGGTAGTCCTTGCCCTAAACGATGCATA
52E AGCAAGGGGAGCAAACAGGATTAGATACCCTGGTAGTCCTTGCCCTAAACGATGCATA
10E AGCAAGGGGAGCAAACAGGATTAGATACCCTGGTAGTCCTTGCCCTAAACGATGCATA
38E AGCAAGGGGAGCAAACAGGATTAGATACCCTGGTAGTCCTTGCCCTAAACGATGCATA
42E AGCAAGGGGAGCAAACAGGATTAGATACCCTGGTAGTCCTTGCCCTAAACGATGCATA
48E AGCAAGGGGAGCAAACAGGATTAGATACCCTGGTAGTCCTTGCCCTAAACGATGCATA
6E AGCAAGGGGAGCAAACAGGATTAGATACCCTGGTAGTCCTTGCCCTAAACGATGCATA
7E AGCAAGGGGAGCAAACAGGATTAGATACCCTGGTAGTCCTTGCCCTAAACGATGCATA
8E AGCAAGGGGAGCAAACAGGATTAGATACCCTGGTAGTCCTTGCCCTAAACGATGCATA
123E AGCAAGGGGAGCAAACAGGATTAGATACCCTGGTAGTCCTTGCCCTAAACGATGCATA
28E AGCAAGGGGAGCAAACAGGATTAGATACCCTGGTAGTCCTTGCCCTAAACGATGCATA
11E AGCAAGGGGAGCAAACAGGATTAGATACCCTGGTAGTCCTTGCCCTAAACGATGCATA
120E AGCAAGGGGAGCAAACAGGATTAGATACCCTGGTAGTCCTTGCCCTAAACGATGCATA
18E AGCAAGGGGAGCAAACAGGATTAGATACCCTGGTAGTCCTTGCCCTAAACGATGCATA
24E AGCAAGGGGAGCAAACAGGATTAGATACCCTGGTAGTCCTTGCCCTAAACGATGCATA
39E AGCAAGGGGAGCAAACAGGATTAGATACCCTGGTAGTCCTTGCCCTAAACGATGCATA
32E AGCAAGGGGAGCAAACAGGATTAGATACCCTGGTAGTCCTTGCCCTAAACGATGCATA
33E AGCAAGGGGAGCAAACAGGATTAGATACCCTGGTAGTCCTTGCCCTAAACGATGCATA
21E AGCAAGGGGAGCAAACAGGATTAGATACCCTGGTAGTCCTTGCCCTAAACGATGCATA
15E AGCAAGGGGAGCAAACAGGATTAGATACCCTGGTAGTCCTTGCCCTAAACGATGCATA
14E AGCAAGGGGAGCAAACAGGATTAGATACCCTGGTAGTCCTTGCCCTAAACGATGCATA
142E AGCAAGGGGAGCAAACAGGATTAGATACCCTGGTAGTCCTTGCCCTAAACGATGCATA
46E AGCAAGGGGAGCAAACAGGATTAGATACCCTGGTAGTCCTTGCCCTAAACGATGCATA
126E AGCAAGGGGAGCAAACAGGATTAGATACCCTGGTAGTCCTTGCCCTAAACGATGCATA
C.pneumoniae_AR39
** *****

```

**Figure S3.** Alignment of panNPCR 58 nt sequences from blood. Polymorphic sites are red shadowed. "Chlamydia-related bacteria" are grey shadowed

**Table S1.** Sputum sample data.

| Number | Sample | Age | Gender | NPCR 461 bp | mtDNA | NPCR 121 bp | 5x2x5 panNPCR |
|--------|--------|-----|--------|-------------|-------|-------------|---------------|
| 1      | DS     | 27  | F      | +           | +     | +           | +             |
| 2      | MŠ     | 24  | F      | -           | +     | -           | -             |
| 3      | BŠ     | 24  | F      | -           | +     | -           | -             |
| 4      | MS     | 27  | M      | -           | +     | -           | -             |
| 5      | PS     | 60  | M      | +           | +     | +           | +             |
| 6      | MR     | 24  | M      | +           | +     | +           | +             |
| 7      | 2SP    | 24  | F      | -           | +     | +           | +             |
| 8      | 3SP    | 25  | F      | -           | +     | -           | -             |
| 9      | 4SP    | 27  | F      | -           | +     | -           | -             |
| 10     | 5SP    | 28  | M      | +           | +     | +           | nd            |
| 11     | 6SP    | 55  | F      | -           | +     | -           | + CRB         |
| 12     | 7SP    | 58  | F      | -           | +     | -           | -             |
| 13     | 10SP   | 27  | F      | +           | +     | +           | nd            |
| 14     | 11SP   | 60  | F      | -           | +     | -           | -             |
| 15     | 17SP   | 28  | F      | -           | +     | -           | -             |
| 16     | 18SP   | 30  | M      | +           | +     | +           | nd            |
| 17     | 20SP   | 26  | F      | +           | +     | +           | nd            |
| 18     | 21SP   | 27  | F      | +           | +     | +           | nd            |
| 19     | 27SP   | 22  | F      | -           | +     | -           | + CRB         |
| 20     | 28SP   | 55  | M      | -           | +     | +           | nd            |
| 21     | 29SP   | 35  | M      | -           | +     | -           | -             |
| 22     | 30SP   | 53  | M      | -           | +     | -           | -             |
| 23     | 33SP   | 23  | Ž      | +           | +     | +           | nd            |
| 24     | 34SP   | 27  | M      | -           | +     | -           | -             |

|    |      |    |   |   |   |   |       |
|----|------|----|---|---|---|---|-------|
| 25 | 37SP | 49 | Ž | - | + | - | -     |
| 26 | 38SP | 49 | M | - | + | - | -     |
| 27 | 39SP | 22 | F | - | + | - | -     |
| 28 | 41SP | 65 | M | - | + | - | -     |
| 29 | 44SP | 65 | M | - | + | - | -     |
| 30 | 45SP | 31 | M | + | + | + | nd    |
| 31 | 48SP | 53 | F | - | + | - | -     |
| 32 | 49SP | 72 | M | - | + | - | -     |
| 33 | 52SP | 29 | F | - | + | - | -     |
| 34 | 54SP | 22 | F | - | + | - | -     |
| 35 | 58SP | 26 | M | - | + | - | + CRB |
| 36 | 60SP | 22 | M | - | + | - | -     |
| 37 | 61SP | 26 | F | - | + | - | -     |
| 38 | 64SP | 23 | F | - | + | - | -     |
| 39 | 66SP | 20 | F | - | + | - | + CRB |
| 40 | 67SP | 20 | F | - | + | + | +     |
| 41 | 68SP | 26 | F | - | + | - | -     |
| 42 | 69SP | 40 | F | - | + | - | -     |
| 43 | 70SP | 31 | M | - | + | - | -     |
| 44 | 1002 | 41 | M | - | + | - | -     |
| 45 | 3001 | 25 | M | - | + | - | +     |
| 46 | 3002 | 25 | M | - | + | + | nd    |
| 47 | 3003 | 25 | M | - | + | + | nd    |
| 48 | 3004 | 24 | M | - | + | - | -     |
| 49 | 3005 | 25 | M | - | + | - | -     |
| 50 | 3006 | 22 | M | - | + | - | -     |
| 51 | 3007 | 28 | F | - | + | - | -     |
| 52 | 3008 | 30 | M | - | + | - | -     |
| 53 | 3009 | 20 | M | - | + | - | -     |
| 54 | 3010 | 22 | M | - | + | - | -     |
| 55 | 3011 | 26 | M | - | + | - | -     |
| 56 | 3012 | 21 | M | - | + | - | -     |
| 57 | 3013 | 28 | M | - | + | - | -     |
| 58 | 3014 | 22 | M | + | + | + | nd    |
| 59 | 3015 | 27 | M | - | + | - | -     |
| 60 | 3016 | 27 | M | + | + | + | +     |
| 61 | 3017 | 30 | M | - | + | - | -     |
| 62 | 3018 | 21 | M | - | + | - | -     |
| 63 | 3019 | 30 | M | - | + | - | -     |
| 64 | 3020 | 30 | M | - | + | - | -     |
| 65 | 3021 | 19 | M | - | + | - | + CRB |
| 66 | 3022 | 21 | M | - | + | + | +     |
| 67 | 3023 | 24 | M | - | + | - | -     |
| 68 | 3024 | 24 | M | - | + | - | -     |
| 69 | 3025 | 24 | M | - | + | - | -     |
| 70 | 3026 | 22 | M | - | + | - | + CRB |
| 71 | 3027 | 21 | M | - | + | - | -     |
| 72 | 3028 | 26 | M | - | + | - | -     |
| 73 | 3029 | 24 | M | - | + | - | -     |

|     |       |    |   |   |   |   |       |
|-----|-------|----|---|---|---|---|-------|
| 74  | 3030  | 23 | F | - | + | - | -     |
| 75  | 3031  | 26 | M | - | + | + | nd    |
| 76  | 3032  | 21 | M | - | + | - | -     |
| 77  | 3033  | 30 | M | - | + | - | + CRB |
| 78  | 5002  | 63 | F | - | + | - | -     |
| 79  | 5003  | 57 | F | - | + | - | -     |
| 80  | 5004  | 51 | M | - | + | - | -     |
| 81  | 5005  | 77 | M | - | + | + | +     |
| 82  | 5006  | 74 | F | - | + | - | -     |
| 83  | 5007  | 66 | M | - | + | - | -     |
| 84  | 5008  | 51 | F | - | + | - | -     |
| 85  | 5009  | 66 | F | - | + | + | nd    |
| 86  | 2CHP  | 24 | M | - | + | - | +     |
| 87  | 3CHP  | 60 | F | - | + | - | -     |
| 88  | 4CHP  | 41 | F | - | + | - | -     |
| 89  | 5CHP  | 59 | M | - | + | - | -     |
| 90  | 7CHP  | 77 | M | - | + | + | +     |
| 91  | 9CHP  | 63 | F | - | + | - | -     |
| 92  | 11CHP | 29 | M | - | + | - | +     |
| 93  | 13CHP | 44 | F | - | + | + | nd    |
| 94  | 14CHP | 47 | M | - | + | + | +     |
| 95  | 15CHP | 47 | M | - | + | - | -     |
| 96  | 16CHP | 26 | F | - | + | + | nd    |
| 97  | 18CHP | 28 | M | - | + | + | nd    |
| 98  | 19CHP | 25 | M | - | + | - | +     |
| 99  | 20CHP | 53 | F | - | + | - | -     |
| 100 | 21CHP | 42 | F | - | + | - | +     |
| 101 | 23CHP | 27 | M | - | + | - | +     |
| 102 | 24CHP | 33 | F | - | + | - | +     |
| 103 | 27CHP | 48 | M | - | + | - | -     |
| 104 | 29CHP | 44 | F | - | + | - | -     |
| 105 | 30CHP | 55 | F | - | + | - | -     |
| 106 | 31CHP | 66 | M | - | + | - | +     |
| 107 | 33CHP | 69 | M | - | + | - | -     |
| 108 | 36CHP | 62 | F | - | + | - | +     |
| 109 | 37CHP | 67 | M | - | + | - | -     |
| 110 | 38CHP | 43 | M | - | + | - | -     |
| 111 | 39CHP | 39 | F | - | + | - | -     |
| 112 | 41CHP | 61 | F | - | + | + | +     |
| 113 | 45CHP | 16 | F | - | + | + | nd    |
| 114 | 48CHP | 37 | M | - | + | + | nd    |
| 115 | 49CHP | 37 | F | - | + | + | +     |
| 116 | 52CHP | 30 | M | - | + | - | + CRB |
| 117 | 53CHP | 55 | F | - | + | - | -     |
| 118 | 57CHP | 43 | F | + | + | + | + CRB |
| 119 | 58CHP | 67 | F | - | + | + | nd    |
| 120 | 60CHP | 22 | M | - | + | + | nd    |
| 121 | 62CHP | 60 | M | - | + | - | -     |
| 122 | 63CHP | 27 | F | - | + | - | -     |

|     |        |    |   |   |                |                |                  |
|-----|--------|----|---|---|----------------|----------------|------------------|
| 123 | 64CHP  | 24 | F | - | +              | -              | + <sup>CRB</sup> |
| 124 | 71CHP  | 28 | M | - | +              | +              | nd               |
| 125 | 73CHP  | 33 | M | - | +*             | -              | +                |
| 126 | 74CHP  | 56 | F | - | +              | -              | + <sup>CRB</sup> |
| 127 | 76CHP  | 29 | M | - | +              | -              | -                |
| 128 | 77CHP  | 33 | M | - | +*             | -              | -                |
| 129 | 78CHP  | 60 | F | - | +              | +              | nd               |
| 130 | 80CHP  | 34 | M | - | +*             | -              | -                |
| 131 | 81SP   | 38 | F | - | +              | -              | + <sup>CRB</sup> |
| 132 | 84CHP  | 60 | F | - | +              | +              | nd               |
| 133 | 85CHP  | 61 | M | - | +              | -              | -                |
| 134 | 88CHP  | 49 | M | - | +              | -              | -                |
| 135 | 91CHP  | 37 | F | - | +              | -              | -                |
| 136 | 92CHP  | 43 | M | - | +*             | -              | -                |
| 137 | 93CHP  | 70 | F | - | +              | +              | nd               |
| 138 | 96CHP  | 45 | F | - | +              | -              | -                |
| 139 | 97CHP  | 27 | F | - | +*             | +              | nd               |
| 140 | 98CHP  | 44 | F | - | +*             | -              | +                |
| 141 | 101CHP | 25 | F | - | +              | -              | +                |
| 142 | 102CHP | 26 | M | - | +*             | -              | -                |
| 143 | 105CHP | 34 | F | - | +              | -              | -                |
| 144 | 107CHP | 23 | F | - | +*             | -              | -                |
| 145 | 108CHP | 25 | F | - | +              | -              | -                |
| 146 | 109CHP | 52 | F | - | +              | -              | + <sup>CRB</sup> |
| 147 | 110CHP | 58 | M | - | +              | -              | +                |
| 148 | 111CHP | -  | M | - | +              | +              | +                |
| 149 | 28CHP  | 32 | M | - | - <sup>e</sup> | nd             | nd               |
| 150 | 34CHP  | 33 | M | - | +              | + <sup>x</sup> | -                |
| 151 | 35CHP  | 32 | F | - | +              | + <sup>x</sup> | + <sup>x</sup>   |
| 152 | 70CHP  | 25 | F | - | - <sup>e</sup> | nd             | nd               |
| 153 | 75CHP  | 29 | F | - | +              | + <sup>x</sup> | + <sup>x</sup>   |
| 154 | 94CHP  | 45 | M | - | +*             | + <sup>x</sup> | + <sup>x</sup>   |
| 155 | 95CHP  | 36 | F | - | - <sup>e</sup> | nd             | nd               |
| 156 | 104CHP | 49 | M | - | +              | + <sup>x</sup> | + <sup>x</sup>   |

M male; F; F Female; \*1023 bp mtDNA amplicon absent, but 250 bp present; nd not determined; <sup>e</sup> excluded from further analysis due to the DNA degradation. <sup>x</sup> not included due to low PCR yield (DNA was not sequenced or provided unreadable sequence); CRB - DNA sequence from *Chlamydia*-related bacteria”.

**Table S2. ELISA vs panNPCR in blood**

| Number | Sample | Gender | Age | IgM | IgG     | IgA  | mtDNA | 5x2x5 panNPCR  | Free DNA |
|--------|--------|--------|-----|-----|---------|------|-------|----------------|----------|
| 1.     | 1E     | M      | 87  | -   | +/-10.1 | 11.8 | +     | + <sup>C</sup> | +        |
| 2.     | 2E     | F      | 43  | -   | -       | -    | +     | -              | nd       |
| 3.     | 3E     | M      | 56  | -   | +/-10.1 | -    | +     | -              | nd       |
| 4.     | 4E     | F      | 70  | -   | +/-10.7 | -    | +     | +              | nd       |
| 5.     | 5E     | F      | 86  | -   | -       | -    | +     | -              | -        |
| 6.     | 6E     | M      | 53  | -   | +/-8.6  | -    | +     | + <sup>C</sup> | -        |



|     |     |   |    |         |         |         |    |                  |    |
|-----|-----|---|----|---------|---------|---------|----|------------------|----|
| 7.  | 7E  | F | 35 | -       | +/-10.9 | -       | +  | + <sup>C</sup>   | -  |
| 8.  | 8E  | F | 43 | +13.5   | -       | -       | +  | + <sup>C</sup>   | -  |
| 9.  | 10E | F | 11 | -       | -       | -       | +  | -                | nd |
| 10. | 11E | F | 28 | -       | +/-10.6 | -       | +  | + <sup>CRB</sup> | nd |
| 11. | 12E | F | 52 | -       | -       | -       | +  | -                | nd |
| 12. | 13E | M | 43 | -       | +12.7   | -       | +  | -                | nd |
| 13. | 14E | F | 39 | +/-11.5 | -       | -       | +  | + <sup>CRB</sup> | +  |
| 14. | 15E | F | 29 | +12     | -       | -       | +  | + <sup>CRB</sup> | nd |
| 15. | 16E | M | 56 | -       | +/-8.7  | -       | +  | -                | nd |
| 16. | 17E | F | 54 | -       | +/-9    | -       | +  | -                | nd |
| 17. | 18E | M | 73 | -       | +/-9.8  | -       | +  | + <sup>CRB</sup> | nd |
| 18. | 19E | F | 67 | -       | +/-11   | +/-8.5  | +  | -                | nd |
| 19. | 20E | M | 62 | -       | -       | -       | +  | + <sup>C</sup>   | nd |
| 20. | 21E | F | 28 | -       | -       | -       | +  | + <sup>CRB</sup> | nd |
| 21. | 22E | F | 73 | -       | +/-9.9  | -       | +  | -                | nd |
| 22. | 23E | F | 64 | -       | -       | -       | +  | -                | nd |
| 23. | 24E | M | 64 | +15.4   | +/-8.9  | -       | +  | + <sup>CRB</sup> | +  |
| 24. | 25E | F | 47 | -       | -       | -       | +  | -                | nd |
| 25. | 26E | M | 40 | -       | +/-9.9  | -       | +  | -                | nd |
| 26. | 27E | F | 66 | -       | -       | -       | +  | -                | nd |
| 27. | 28E | M | 30 | -       | -       | -       | +* | + <sup>CRB</sup> | nd |
| 28. | 29E | F | 65 | -       | -       | -       | +* |                  | nd |
| 29. | 30E | F | 69 | -       | -       | -       | +  | -                | nd |
| 30. | 31E | F | 60 | -       | -       | +/-11.3 | +  | -                | nd |
| 31. | 32E | M | 42 | +17.5   | -       | -       | +  | + <sup>CRB</sup> | +  |
| 32. | 33E | F | 41 | +/-8.9  | -       | -       | +  | + <sup>CRB</sup> | -  |
| 33. | 35E | F | 81 | -       | -       | +/-11.5 | +* | -                | nd |
| 34. | 36E | F | 43 | -       | +/-9.5  | -       | +  | -                | nd |
| 35. | 38E | F | 44 | +/-8.8  | -       | -       | +  | + <sup>C</sup>   | -  |
| 36. | 39E | M | 46 | -       | -       | -       | +  | + <sup>CRB</sup> | nd |
| 37. | 41E | M | 26 | -       | -       | +/-9.8  | +  | -                | nd |
| 38. | 42E | F | 36 | -       | -       | -       | +  | + <sup>C</sup>   | nd |
| 39. | 43E | F | 38 | -       | -       | -       | +  | -                | nd |
| 40. | 44E | F | 45 | -       | +13.1   | -       | +* | -                | nd |
| 41. | 45E | F | 41 | -       | -       | -       | +  | -                | nd |
| 42. | 46E | M | 59 | -       | +12     | -       | +* | + <sup>CRB</sup> | nd |
| 43. | 47E | M | 10 | -       | -       | -       | +* | -                | nd |
| 44. | 48E | F | 52 | -       | -       | -       | +  | + <sup>C</sup>   | nd |
| 45. | 49E | M | 17 | -       | -       | -       | +  | -                | nd |
| 46. | 50E | F | 35 | -       | -       | -       | +  | -                | nd |
| 47. | 51E | F | 10 | -       | -       | -       | +  | -                | nd |
| 48. | 52E | F | 37 | -       | +/-10.8 | -       | +  | + <sup>C</sup>   | nd |
| 49. | 53E | F | 50 | -       | +13.2   | -       | +  | -                | nd |
| 50. | 54E | F | 75 | -       | -       | -       | +  | -                | nd |
| 51. | 55E | F | 90 | -       | +14.2   | +25     | +  | -                | nd |
| 52. | 56E | F | 42 | -       | -       | -       | +  | -                | nd |

|     |      |   |    |         |         |        |   |                  |    |
|-----|------|---|----|---------|---------|--------|---|------------------|----|
| 53. | 57E  | F | 31 | -       | +12.2   | -      | + | -                | nd |
| 54. | 58E  | M | 43 | -       | -       | -      | + | -                | nd |
| 55. | 59E  | F | 5  | -       | -       | -      | + | +                | nd |
| 56. | 60E  | F | 79 | -       | +/-11   | -      | + | -                | nd |
| 57. | 66E  | M | 87 | -       | +12.9   | -      | + | -                | nd |
| 58. | 67E  | F | 67 | -       | +12.2   | -      | + | -                | nd |
| 59. | 69E  | M | 35 | -       | +12.7   | -      | + | -                | nd |
| 60. | 70E  | M | 64 | -       | +/-10.7 | -      | + | -                | nd |
| 61. | 71E  | M | 67 | -       | +14.8   | +12.3  | + | -                | nd |
| 62. | 72E  | F | 66 | -       | +/-8.7  | -      | + | +                | nd |
| 63. | 73E  | M | 48 | -       | +13.2   | -      | + | -                | nd |
| 64. | 74E  | F | 66 | -       | +22.3   | +12    | + | -                | nd |
| 65. | 75E  | M | 59 | -       | +23.8   | +33.2  | + | -                | nd |
| 66. | 76E  | F | 37 | -       | -       | -      | + | -                | nd |
| 67. | 77E  | F | 45 | -       | -       | -      | + | -                | nd |
| 68. | 78E  | F | 39 | -       | +12.5   | -      | + | +                | nd |
| 69. | 79E  | F | 31 | -       | +/-10   | +14.3  | + | +                | nd |
| 70. | 84E  | F | 39 | -       | +13.4   | -      | + | +                | nd |
| 71. | 85E  | F | 43 | -       | -       | +14.7  | + | + <sup>CRB</sup> | nd |
| 72. | 86E  | M | 64 | -       | +24.8   | +12.8  | + | -                | nd |
| 73. | 88E  | M | 36 | -       | -       | +/-9.4 | + | -                | nd |
| 74. | 89E  | F | 82 | -       | -       | -      | + | -                | nd |
| 75. | 90E  | F | 62 | -       | +/-8.5  | +20    | + | -                | nd |
| 76. | 95E  | F | 17 | +/-10.7 | -       | -      | + | -                | nd |
| 77. | 115E | F | 50 | +19     | +12.5   | -      | + | -                | nd |
| 78. | 116E | M | 31 | +/-10.1 | -       | -      | + | -                | nd |
| 79. | 120E | F | 40 | +/-11.5 | +14.2   | -      | + | + <sup>CRB</sup> | nd |
| 80. | 122E | F | 73 | +/-9    | +14.5   | -      | + | + <sup>CRB</sup> | nd |
| 81. | 123E | F | 68 | +/-10   | +/-11.3 | -      | + | + <sup>CRB</sup> | nd |
| 82. | 124E | F | 70 | -       | +20.7   | -      | + | -                | nd |
| 83. | 125E | M | 46 | -       | +17.5   | -      | + | -                | nd |
| 84. | 126E | M | 34 | +12.8   | +/-10.1 | -      | + | + <sup>CRB</sup> | nd |
| 85. | 127E | M | 35 | -       | +19.9   | +/-9.9 | + | -                | nd |
| 86. | 130E | M | 72 | -       | +16.3   | -      | + | -                | nd |
| 87. | 131E | F | 8  | +/-10.1 | -       | -      | + | -                | nd |
| 88. | 132E | F | 39 | -       | +16.1   | -      | + | -                | nd |
| 89. | 137E | F | 66 | -       | +22.7   | -      | + | -                | nd |
| 90. | 142E | M | 46 | +/-10.3 | -       | -      | + | + <sup>CRB</sup> | nd |
| 91. | 143E | F | 34 | -       | +15.5   | -      | + | +                | nd |
| 92. | 151E | F | 26 | +/-10.3 | -       | -      | + | -                | nd |
| 93. | 152E | F | 66 | +/-10.3 | -       | -      | + | -                | nd |
| 94. | 153E | M | 47 | +/-10.3 | -       | -      | + | -                | nd |

M male; F female; ELISA IgA, IgM, IgG: Cut-off: 10; Grey zone: 8,5-11,5; Negative: <8,5; Positive: >11,5. C - DNA sequence from the genus *Chlamydia*, CRB - DNA sequence from *Chlamydia*-related bacteria". \*1023 bp mtDNA amplicon absent, but 250 bp present; nd - not determined; 4E, 59E, 72E, 78E, 79E, 84E, 143E were not sequenced.
